1 An endosymbiont harvest: Phylogenomic analysis  
2 of *Wolbachia* genomes from the Darwin Tree of Life  
3 biodiversity genomics project

4 Emmelien Vancaester<sup>1\*</sup>, Mark Blaxter<sup>1</sup>

5 <sup>1</sup> Tree of Life, Wellcome Sanger Institute, Hinxton, CB10 1SA, UK

6 \* Corresponding author:

7

8 Emmelien Vancaester ORCID <https://orcid.org/0000-0002-9177-8808> [ev3@sanger.ac.uk](mailto:ev3@sanger.ac.uk)

9 Mark Blaxter ORCID <https://orcid.org/0000-0003-2861-949X> [mb35@sanger.ac.uk](mailto:mb35@sanger.ac.uk)

10 Keywords: *Wolbachia* alphaproteobacteria, endosymbiosis, host-symbiont coevolution,  
11 *Wolbachia* phage, cytoplasmic incompatibility

## 12 Abstract

13 The Darwin Tree of Life project aims to sequence all described terrestrial and aquatic  
14 eukaryotic species found in Britain and Ireland. Reference genome sequences are generated  
15 from single individuals for each target species. In addition to the target genome, sequenced  
16 samples often contain genetic material from microbiomes, endosymbionts, parasites and other  
17 cobionts. *Wolbachia* endosymbiotic bacteria are found in a diversity of terrestrial arthropods  
18 and nematodes, with supergroups A and B the most common in insects. We identified and  
19 assembled 110 complete *Wolbachia* genomes from 93 host species spanning 92 families by  
20 filtering data from 368 insect species generated by the Darwin Tree of Life project. From 15  
21 infected species we assembled more than one *Wolbachia* genome, including cases where  
22 individuals carried simultaneous supergroup A and B infections. Different insect orders had  
23 distinct patterns of infection, with Lepidopteran hosts mostly infected with supergroup B, while  
24 infections in Diptera and Hymenoptera were dominated by A-type *Wolbachia*. Other than these  
25 large-scale order-level associations, host and *Wolbachia* phylogenies revealed no (or very  
26 limited) cophylogeny. This points to the occurrence of frequent host switching events, including  
27 between insect orders, in the evolutionary history of the *Wolbachia* pandemic. While  
28 supergroup A and B genomes had distinct GC% and GC skew, and B genomes had a larger  
29 core gene set and tended to be longer, it was the abundance of active and pseudogenised  
30 copies of bacteriophage WO who was a strong determinant of *Wolbachia* genome size. Mining  
31 raw genome data generated for reference genome assemblies is a robust way of identifying  
32 and analysing cobiont genomes and giving greater ecological context for their hosts.

## 33 Introduction

34 The natural world is a complex web of interactions between living species. These interactions  
35 can be mutualistic, commensal, pathogenic, parasitic, predatory or inconsequential, but each  
36 individual lives alongside a rich diversity of cobionts. Most eukaryotes associate intimately with  
37 a specific microbiota, and are commonly infected by a range of microbial and other pathogens.  
38 For some microbial associates the distinction between mutualism and pathogenicity or  
39 parasitism is fuzzy. For example, *Wolbachia* (Proteobacteria; Alphaproteobacteria;  
40 Rickettsiales; Anaplasmataceae; Wolbachieae) are found living intracellularly in a range of  
41 terrestrial arthropods and nematodes. No free-living *Wolbachia* are known: the association is  
42 essential for their survival. In contrast, infection with *Wolbachia* can be beneficial to hosts, but  
43 is not usually essential.

44 *Wolbachia* were first identified as mosquito endobacteria that were maternally transmitted,  
45 through the oocyte, and that induced a range of reproductive manipulations on their hosts<sup>1,2</sup>.  
46 The most common manipulation by *Wolbachia* is to induce cytoplasmic incompatibility (CI).  
47 Under CI, infected females are able to mate productively with all males, but uninfected females  
48 are only able to mate with uninfected males (as mating with CI-inducing *Wolbachia*-infected  
49 males results in zygotic death). This asymmetry in fitness can drive spread of the CI-inducing  
50 *Wolbachia*. Other reproductive manipulations include feminisation of genetic males<sup>3</sup>, male  
51 killing<sup>4</sup> and induction of parthenogenesis in females<sup>5</sup>. All these manipulations promote the  
52 transmission of infected oocytes to the next host generation, and thus boost the spread of  
53 *Wolbachia*. In most species that can be infected, populations are a mix of infected and  
54 infection-free individuals, and hosts can evolve to resist infection<sup>6,7</sup>. While *Wolbachia* are often  
55 described as reproductive parasites, association with *Wolbachia* can sometimes have  
56 beneficial effects, providing nutritional supplementation to phloem-feeding hemiptera<sup>8</sup>, and  
57 enhancing host immunity to viruses and *Plasmodium* parasites<sup>9</sup>. Indeed the host immunity-  
58 boosting phenotype may explain the initial spread of *Wolbachia* in previously uninfected  
59 populations. In nematodes, elimination of *Wolbachia* induces host sterility, and antibiotic  
60 treatment is an effective addition to pharmacological treatment of human-infecting, *Wolbachia*-  
61 positive filarial nematodes<sup>10</sup>.

62 *Wolbachia* infection of terrestrial arthropods is very common, with nearly half of all insect  
63 species predicted to be infected<sup>11</sup>. *Wolbachia* can be classified using molecular phylogenetic  
64 analyses into a series of supergroups<sup>12,13</sup>. Supergroups C, D and J are found only in filarial  
65 nematodes, supergroups E and F are found in both nematodes and insects, and supergroups  
66 A, B and S (and others for which full genome data are not available) are found only in  
67 arthropods. Supergroups A and B are the most common *Wolbachia* found in terrestrial insects.

68 Analysis of *Wolbachia* biology has been expanded by the determination of genome sequences  
69 for many isolates. The genome sequences for *Wolbachia* from over 90 host species are  
70 publicly available, and mining of host genomic raw sequence data identified a large number  
71 of additional partial genomes<sup>14</sup>. This understanding, that cobiont genomes can be assembled  
72 from the “contamination” present in the data generated for a target host, has been especially  
73 useful for the unculturable *Wolbachia*. We now have the opportunity to survey for the presence  
74 of *Wolbachia* genomes at an unprecedented scale, as the Darwin Tree of Life (DTOL) project  
75 aims to sequence all described terrestrial and aquatic eukaryotic species found in Britain and  
76 Ireland<sup>15</sup>. This project is using high-accuracy long read and chromatin conformation long range

77 sequencing to generate and release publicly available chromosomal genome assemblies,  
78 meeting exact standards of contiguity and completeness, for thousands of protists, fungi,  
79 plants and animals. Several hundred terrestrial arthropod assemblies are already available  
80 (<https://portal.darwintreeoflife.org>).

81 The DToL project sequences genomes from individual, wild-caught specimens of target  
82 species, and thus will also generate data for the cobiont present in each specimen at the  
83 time of sampling. Where possible, DToL processing usually avoids body parts or tissues that  
84 are expected to have a high relative mass of cobionts. In smaller-bodied species, where the  
85 whole organism is extracted, and in cases where *Wolbachia* disseminates widely within an  
86 organism it is inevitable that cobiont genomes will be sequenced alongside the host genome.

87 Using k-mer classification tools, it is possible to efficiently and correctly separate out cobiont  
88 data from that of the host, and to deliver clean host assemblies<sup>16–18</sup>. The cobiont data are then  
89 available for independent assembly and analysis. Here we present a survey of the first 368  
90 terrestrial arthropod genome datasets produced in DToL for the presence of *Wolbachia*, and  
91 assemble over 100 new *Wolbachia* genomes. We use these to explore patterns and processes  
92 in bacterial genome evolution and coevolution of *Wolbachia* with its hosts and with its own  
93 bacteriophage parasites. Lepidopteran hosts were mostly infected with supergroup B, while  
94 infections in Diptera and Hymenoptera were mainly caused by A-type *Wolbachia*. However,  
95 host and *Wolbachia* phylogenies revealed no (or very limited) cophylogeny. We show that  
96 while B genomes tended to be longer compared to supergroup A, genome size in *Wolbachia*  
97 is correlated with the level of integration of its double-stranded bacteriophage WO.

## 98 Results

### 99 Screening a diverse set of insect genome data for *Wolbachia* 100 infections

101 We screened raw genomic sequence data and primary assemblies for 368 insect species (204  
102 Lepidoptera, 61 Diptera, 52 Hymenoptera, 24 Coleoptera, 9 Hemiptera, 5 Trichoptera, 4  
103 Orthoptera, 3 Ephemeroptera, 3 Plecoptera, 2 Odonata and 1 Neuroptera) generated by DToL  
104 for the presence of *Wolbachia* ([Table S1](#)) using the small subunit ribosomal RNA (SSU rRNA)  
105 as a marker gene. *Wolbachia* SSU sequences were detected in 111 (30%) of the species.  
106 This degree of infection is similar to previous estimates (ranging from 22%<sup>19,20</sup> to 40%<sup>11</sup> of all  
107 arthropods). While the DToL project aims to sequence eukaryotes from across Britain and  
108 Ireland, 82% of the samples screened were sampled from the Wytham Woods Ecological  
109 Observatory, Oxfordshire (<https://www.wythamwoods.ox.ac.uk/>)<sup>21</sup>. No correlation between  
110 sampling location and incidence level was detected, with 29% of all samples collected in  
111 Wytham Woods being *Wolbachia* positive, reflective of the overall incidence level (Figure S1).

112 *Wolbachia* prevalence and infection intensity varies between species and between  
113 populations within a species<sup>22,23</sup>. As only one individual was analysed for each taxon screened,  
114 the true level of infection within the insect biota surveyed by DToL is likely much higher.  
115 Incidence was lower in Coleoptera (4/24, 17%) compared to Lepidoptera (55/204, 27%),  
116 Diptera (21/61, 34%) and Hymenoptera (23/52, 44%) (Figure 1A). We observed an equal  
117 prevalence of infection in samples identified as female (39/138, 28%) and male (45/153, 29%)  
118 (Figure 1B).

119 The DToL species were sequenced using PacBio Sequel II HiFi highly accurate long read  
120 platform, generating consensus raw reads of 10-20 kb with base level accuracy of >99%  
121 (~Q30-40). These long, accurate reads are ideal for assembly, particularly for bacterial  
122 genomes where the information content per base is higher than in repeat-rich eukaryotes. The  
123 average sequence length of HiFi reads identified as being derived from *Wolbachia* was 12 kb,  
124 indistinguishable from host HiFi reads. We separated and assembled all *Wolbachia* reads in  
125 each positive sample and screened these assemblies to identify complete genomes. We  
126 generated 110 complete genomes, from 93 species, of which 77 were circular ([Table S2](#)). The  
127 average completeness of these genomes, assessed using BUSCO, was 99.3%, with a mean  
128 duplication level of 0.37%. The mean genome size of the new genomes was 1.47 Mb, which  
129 is significantly larger than the average genome size of public *Wolbachia* genomes (1.32 Mb;  
130 Wilcoxon rank sum test, p-value =  $4.576 \times 10^{-9}$ ) (Figure S2). This is likely because it is possible  
131 to assemble across repeated loci (such as integrated *Wolbachia* phage) with the long,  
132 accurate HiFi reads. The mean number of contigs generated for the 33 genomes that could  
133 not be circularised was 2.12 (ranging from 1 to 6).

134 The dataset includes the first *Wolbachia* genomes assembled from two insect orders, Odonata  
135 (dragonflies and damselflies) and Orthoptera (grasshoppers and crickets). Both species of  
136 dragonfly surveyed (Odonata) harboured *Wolbachia* (Figure 1A). The largest circular  
137 *Wolbachia* genome generated, 2.19 Mb, was isolated from the blue-tailed damselfly. This is  
138 the longest complete *Wolbachia* genome yet reported (Figure 5A). Although in most samples  
139 infection by only a single *Wolbachia* strain was detected, 15 of 93 specimens (16%) were

140 infected with at least two *Wolbachia* genomes. Within *Phalera bucephala* (Lepidoptera) and  
141 *Lasioglossum morio* (Hymenoptera) three genomes were assembled, while all other co-  
142 infections involved two strains.

143 Having chromosomally-complete insect host genomes, as well as complete *Wolbachia* allows  
144 for the estimation of the relative numbers of *Wolbachia* genomes per host genome. Most  
145 infected hosts tightly control *Wolbachia* proliferation and have a relative abundance below ten  
146 *Wolbachia* genomes per host nuclear genome. Particularly high abundances were observed  
147 in *Thymelicus sylvestris* (48 *Wolbachia* per host) and *Athalia cordata* (47) ([Table S2](#)) (Figure  
148 1C). The mean relative abundance in different taxonomic orders lay between 3 and 12, except  
149 for the two crickets (Orthoptera), *Chorthippus brunneus* and *Chorthippus parallelus*, which  
150 have a 33 and 20 *Wolbachia* genome copies per host genome, respectively (Figure 1C). No  
151 significant difference was observed between relative *Wolbachia* abundance and sex of the  
152 host (Figure 1D), with both male and female having a mean between nine and ten copies.

153 **Figure 1: Prevalence and relative abundance of *Wolbachia* in**  
 154 **DTOL insect genomes.**

155 **A, B** Prevalence of *Wolbachia* in insect hosts, split by taxonomic order (A) and by sex (B). The  
 156 cladogram of insect ordinal relationships is based on Misof et al<sup>24</sup>. Orders with more than 10  
 157 analysed species are shown in bold. Silhouettes are from PhyloPic (<http://phylopic.org/>). Sex  
 158 of insects was classified as F (female), M (male) or U (unknown, where not recorded on  
 159 collection).

160 **C, D** The estimated number of *Wolbachia* genomes per copy of the host nuclear genome split  
 161 by taxonomic order (C) and by sex (D).

162

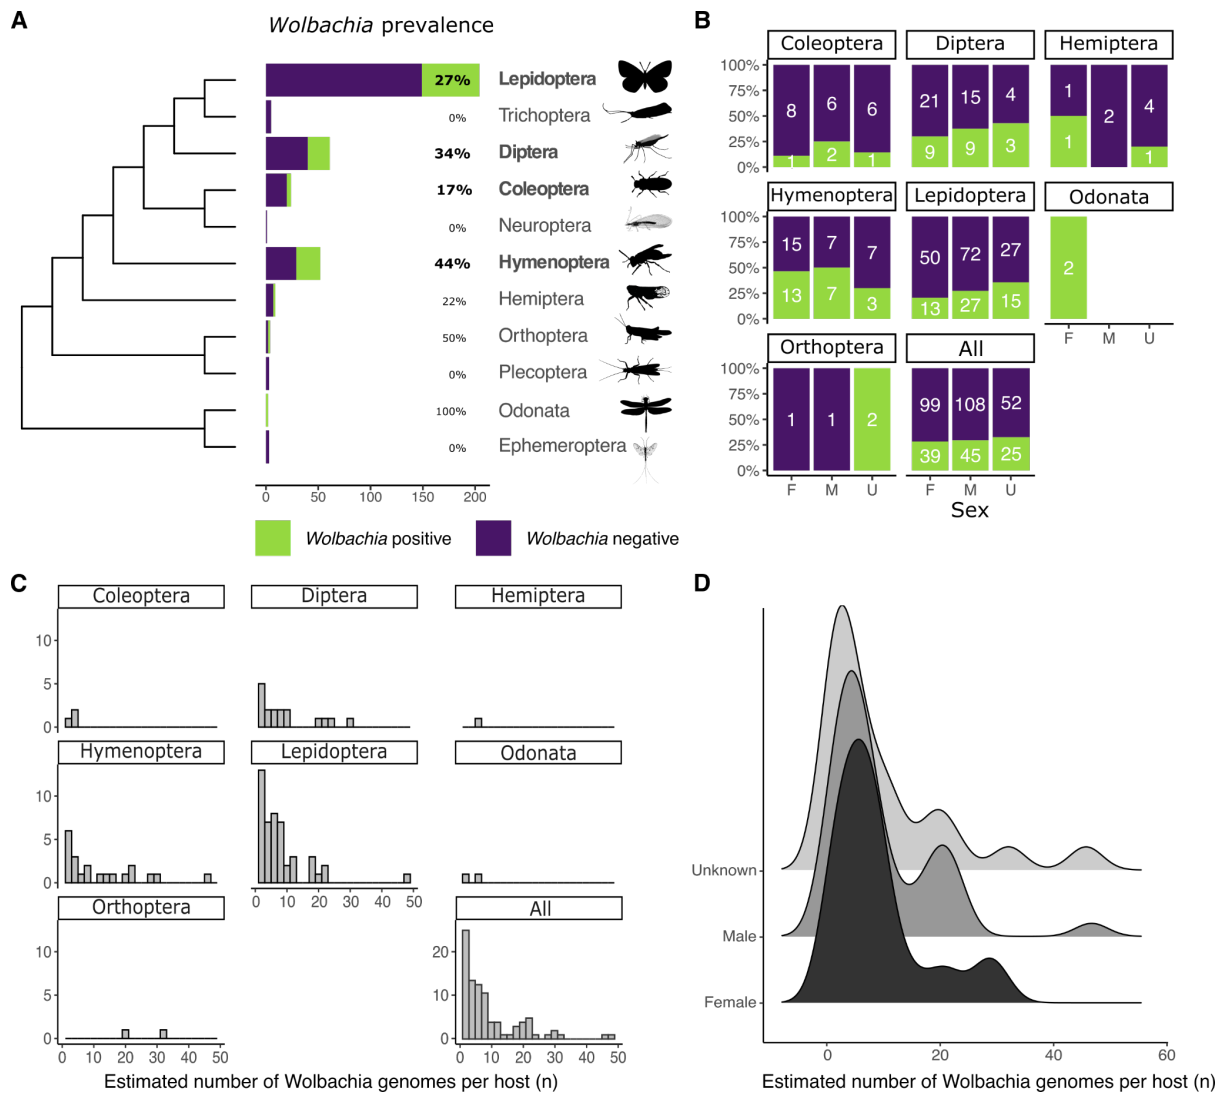

163



## 164 *Wolbachia* phylogeny suggests frequent host switching events

165 We selected 93 high-contiguity and high-completeness *Wolbachia* genomes from the public  
166 INSDC databases, including genomes from *Wolbachia* infecting Nematoda (13 genomes),  
167 Arachnida (4), Isopoda (1) and several orders of Hexapoda (75) ([Table S3](#)). Adding the 110  
168 newly assembled genomes yielded a dataset of over 200 high-quality assemblies. We  
169 annotated all protein-coding genes in those genomes using Prodigal<sup>25</sup>, and clustered the  
170 predicted protein sets into orthologous groups using OrthoFinder2<sup>26</sup>. The resulting 634 near-  
171 single copy genes were used to infer a phylogeny of *Wolbachia* (Figure 2A, Figure S3). From  
172 this phylogeny we assigned each genome to the previously defined *Wolbachia*  
173 supergroups<sup>12,13</sup>. All newly assembled *Wolbachia* genomes belonged to either supergroup A  
174 or B. While Lepidoptera were predominantly infected with supergroup B *Wolbachia* (42/53,  
175 80%), *Wolbachia* supergroup A was most frequent in all other insect classes (46/57, 81%). It  
176 has been previously observed that supergroup B is the most common *Wolbachia* type in  
177 Lepidoptera<sup>19,27–29</sup>. Of the 15 species where co-infections occurred, *Endotricha flammealis*,  
178 *Phalera bucephala*, *Philonthus cognatus*, *Protocalliphora azurea* and *Sphaerophoria taeniata*  
179 were co-infected with strains from both A and B supergroups, and the other ten co-infections  
180 were of distinct strains within the same supergroup ([Table S2](#)).

181 *Wolbachia* generally do not show strict cophylogeny with their hosts<sup>7,23</sup>. This pattern was also  
182 observed when comparing host and *Wolbachia* phylogenies for the supergroup A and B  
183 genomes (Figure 2B). Closely related insect species may be infected by dissimilar *Wolbachia*  
184 strains and conversely, closely related *Wolbachia* can infect a diverse set of insects. For  
185 example, the *Wolbachia* strains infecting the hoverfly *Eupeodes latifasciatus* and four  
186 Lepidoptera (*Pararge aegeria*, *Celastrina argiolus*, *Hylaea fasciata*, *Watsonella binaria*)  
187 (Figure 2C) share over 99% nucleotide identity. Because most of our new samples came from  
188 a single site (Wytham Woods Genomic Observatory) we were also able to explore the  
189 horizontal transfer of *Wolbachia* between hosts in a local context. Wytham Woods-derived  
190 *Wolbachia* were no more likely to be related than any other *Wolbachia* subset (Figure S4).



191 **Figure 2: *Wolbachia* DTOL genomes expand known phylogeny.**

192 **A** Circular phylogeny of supergroup A and B *Wolbachia*, visualised with the root placed  
 193 between the A and B supergroups and the remaining supergroups (C,D,E,F, J, S; nodes  
 194 collapsed as grey wedge), highlighting newly sequenced genomes (black tip labels) and  
 195 genomes from public databases (white).

196 **B** Incongruence between host topology (left) and supergroup A and B *Wolbachia* topology  
 197 (right) is shown as a tanglegram. Overview of the supergroups infecting diverse insect orders  
 198 is given in a table (inset, bottom right).

199 **C** Example of a host switching event, where the *Wolbachia* of the hoverfly *Eupeodes*  
 200 *latifasciatus* has high nuclear sequence identity and genome colinearity to four *Wolbachia*  
 201 genomes assembled from Lepidoptera.

202

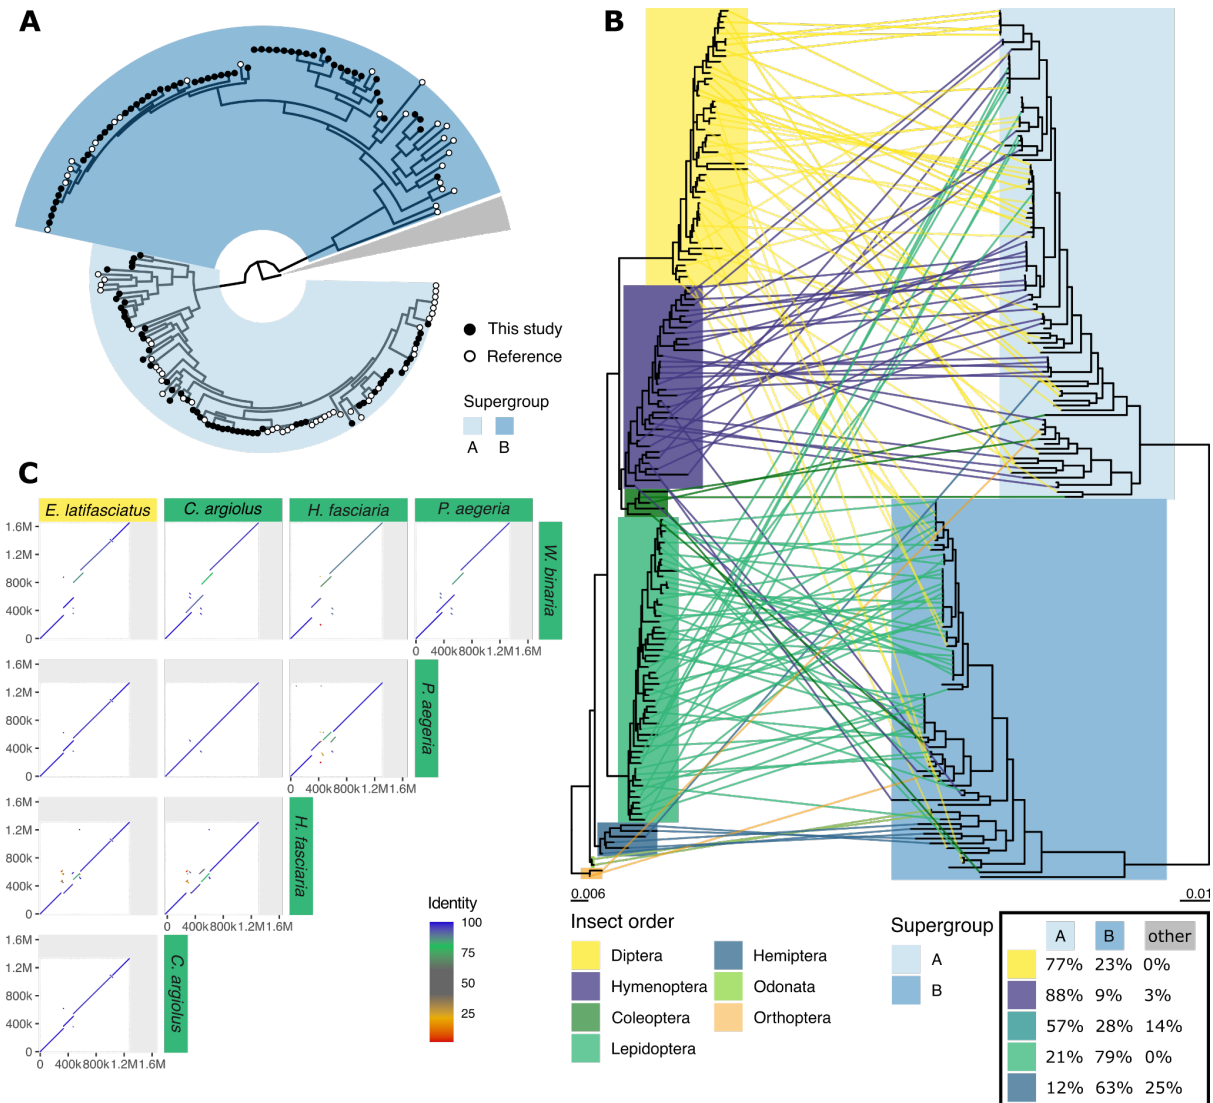

203

## 204 Intrinsic properties of *Wolbachia* distinguish supergroups

205 The completeness of the new genomes, and in particular the circular assemblies achieved for  
206 77 of them, permits analyses of genome properties that are not possible with fragmented and  
207 partial genomes. All circularised genomes, including those from public databases, were  
208 rotated to start at the presumed origin of replication. The average pairwise whole genome  
209 nucleotide identity between all *Wolbachia* genomes ranged between 77.3% and 100.0%, with  
210 at least 92.8% and 93.5% identity within supergroup A and B, respectively (Figure 3A). The  
211 number of breakpoints interrupting pairwise whole-genome alignments was counted,  
212 normalised for the total alignable length, and compared to average nucleotide identity (ANI) of  
213 the compared genomes (Figure 3A). A significant correlation was observed between  
214 nucleotide divergence and the number of breakpoints in supergroups A (0.90,  $p < 2.2e^{-16}$ ,  
215 Spearman correlation) and B (0.69,  $p < 2.2e^{-16}$ , Spearman correlation) (Figure 3A).

216 GC skew accumulates in stable bacterial genomes through differential mutation pressures on  
217 leading versus lagging strands. Genomes that have undergone frequent rearrangement are  
218 expected to have lower overall GC skew, which can be summarised across the genome as a  
219 single metric, Skewl<sup>30</sup>. Genomes from supergroups A and B had distinct GC contents (Figure  
220 3B), with supergroup A having a higher mean GC (35.2%, standard deviation 0.15%),  
221 compared to B (34.0%, standard deviation 0.16%) (two-sample t-test p-value  $< 2.2e^{-16}$ ).  
222 Genomes from other supergroups had distinct GC content, often very different from A and B  
223 genomes, but as so few examples have been sequenced, general patterns are not discernible.  
224 In both A and B supergroups Skewl values were relatively low, but genomes from *Wolbachia*  
225 from nematode hosts (C, D, J) had higher Skewl values (Figure 3B). A high degree of GC  
226 skew had already been observed in the *Wolbachia* strain infecting *Dirofilaria immitis*  
227 (supergroup C)<sup>31</sup>. This suggests that nematode-associated *Wolbachia* have retained  
228 chromosome stability across a long timeframe, not observed in supergroups A and B, also  
229 evident by their large number of re-arrangements (Figure 3A).

230 **Figure 3: Comparative genomics of *Wolbachia*.**

231 **A** Average nucleotide identity (ANI) plotted against the number of breakpoints in comparisons  
232 within A supergroup genomes, within B, between A and B and between other supergroup  
233 *Wolbachia*.

234 **B** Index of skewness compared to GC content for all circularised *Wolbachia* genomes.

235

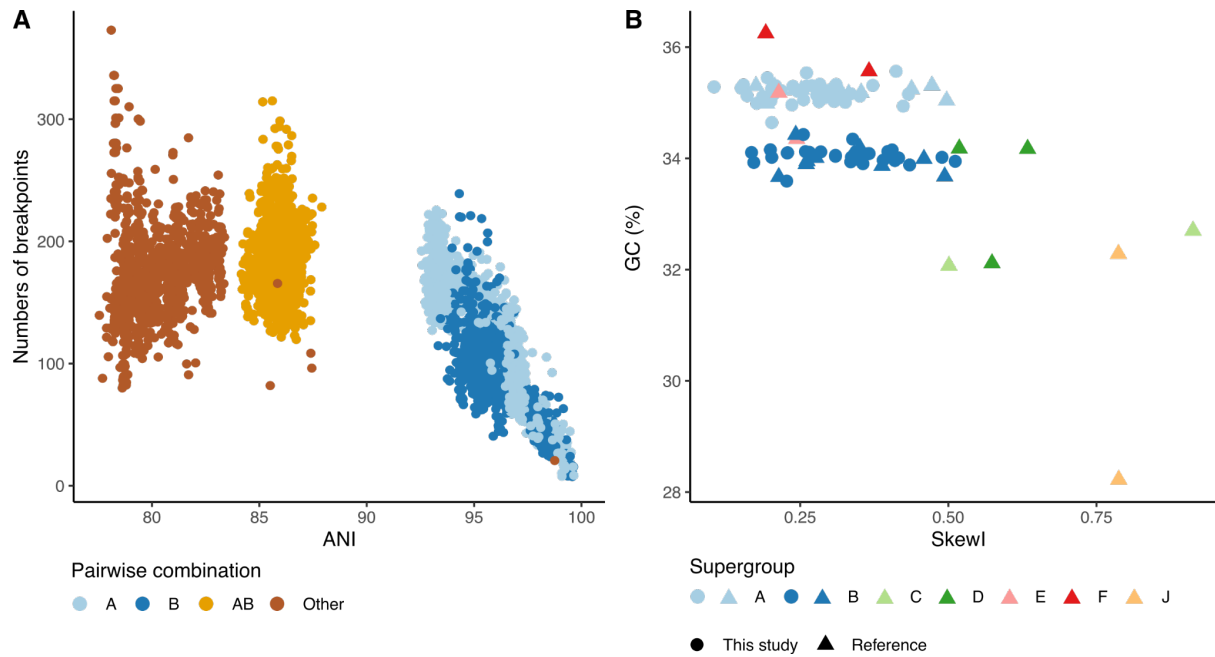

236

## 237 Conservation and diversity in gene content of *Wolbachia*

238 *Wolbachia*, because they are sheltered within the cells of their hosts, may be relatively isolated  
239 from other bacteria, and thus have somewhat closed pan-genomes. One route to acquisition  
240 and sharing of new genes is through the *Wolbachia* phage (WO phage), which alongside the  
241 essential phage particle structural genes carry a cargo of genes that have been implicated in  
242 host manipulation. We re-annotated all 203 *Wolbachia* with the same, standard gene finding  
243 toolkit, Prodigal, to normalise annotations. While this may have lost careful manual revision in  
244 previously determined gene sets, it avoids issues of data incompatibility. Gene number  
245 correlated with genome size, and the average gene number in the newly assembled set of  
246 supergroup A and B *Wolbachia* was larger than in A and B genomes from the public databases  
247 (Figure S5). Comparing all genomes, the mean number of predicted genes was larger in  
248 supergroup B (1467) compared to A (1385).

249 We used OrthoFinder with default settings to define clusters of orthologous proteins across all  
250 *Wolbachia* genomes. Each genome contained between 0 and 184 novel, strain-specific genes  
251 (average 19). These novel genes were shorter than all genes (average gene length overall  
252 was 875 nucleotides or ~290 amino acids, while novel genes averaged 434 nucleotides or  
253 ~145 amino acids). As expected, supergroups which were not well represented often  
254 contained more strain-specific genes. For example, wCfeT from supergroup E (which infects  
255 cat fleas, *Ctenocephalides felis*) uniquely encoded genes for pantothenate (panC-panG-panD-  
256 panB)<sup>32</sup> and thiamine (thiG-thiC) biosynthesis. Nonetheless, out of the ten genomes with most  
257 strain-specific genes, seven belonged to either supergroup A or B. These novel genes were  
258 not preferentially associated with WO phage regions (Figure S6) but the majority (78%) had  
259 annotations that associated them with transposon and mobile element function. This suggests  
260 that much of the novelty arose through mobile elements other than WO phage. Other than  
261 clusters with one or two members, the most frequently observed cluster sizes were 203±2.  
262 These clusters contained the single-copy (and near-single-copy) orthologs deployed in  
263 phylogenetic analyses (Figure 4A). Overall, the majority of the proteins encoded in the  
264 *Wolbachia* genomes were members of orthology clusters that were present in at least 95% of  
265 all strains.

266 The abundant sampling of supergroup A and B genomes allowed us to address and compare  
267 the sizes of the core- and pan-proteomes of these groups. The larger genome and proteome  
268 size found in supergroup B was reflected in a larger core proteome (Figure 4B), but supergroup  
269 A had a larger pan-proteome (Figure 4B). While the core proteomes differed, very few of the  
270 protein families that were part of each supergroup's core proteome were unique to that  
271 supergroup. One supergroup-restricted set of protein families was found to comprise the  
272 operon for arginine transport (ArtM, ArtQ and ArtP and the repressor of arginine degradation  
273 ArgR)<sup>33</sup>, which was uniquely detected and conserved in supergroup A (present in 83/103 or  
274 80% of all *Wolbachia* A genomes). Although the periplasmic arginine-specific binding protein  
275 (ArtI or ArtJ) was not detected, the presence of this ATP-binding cassette-type (ABC)  
276 transporter suggests that these *Wolbachia* are acquiring arginine from their hosts.

277 The operon producing biotin (vitamin B7)<sup>34</sup> was detected in seven of the 110 new genomes,  
278 all belonging to supergroup A (Figure 4C). One derived from *Icerya purchasi* (Hemiptera) and  
279 six were from Hymenoptera (two from *Lasioglossus malacharum*, which carried two strains,  
280 and single strains from three *Andrena* and a *Nomada* species). The biotin synthesis cluster  
281 has been described previously from a restricted but diverse set of supergroups, including two

282 A genomes from additional *Nomada* bee hosts. This distribution suggests possible ecological  
283 linkage<sup>35</sup>, as *Andrena* bees are kleptoparasitized by *Nomada* cuckoo bees and phylogenetic  
284 analyses of both the biotin gene clusters and the *Wolbachia* core proteomes show close  
285 relationships between this cluster of genomes (Figure S7). The gene cluster is strongly  
286 conserved in physical organisation of all six necessary genes (bioA-D,F,H). In the genomic  
287 region immediately surrounding the operon we identified recombinase and transposase  
288 genes, as well as ankyrin repeat containing genes and toxin-antitoxin cytoplasmic  
289 incompatibility Cin gene pairs. In three genomes (from *Andrena dorsata*, *Nomada fabricium*  
290 and one of the *L. malacharum* strains) the operon was independently disrupted by  
291 transposases. The region containing the biotin operon thus has the hallmarks of a “virulence  
292 island” that may be mobile between genomes, and may have accrued additional genes  
293 (ankyrin, Cin) that hitchhike with the biotin operon.

294 **Figure 4: Exploration of *Wolbachia* protein-coding gene**  
 295 **diversity.**

296 **A** Histogram of protein family size per supergroup.

297 **B** Rarefaction analysis of pan- and core proteomes of supergroups A and B, based on 500,000  
 298 random addition-order permutations of co-occurring orthogroups excluding novel genes.

299 **C** Synteny of the biotin cluster shows conserved gene order and punctuated pattern of species  
 300 presence (inset, species with biotin cluster present are highlighted with red circles).

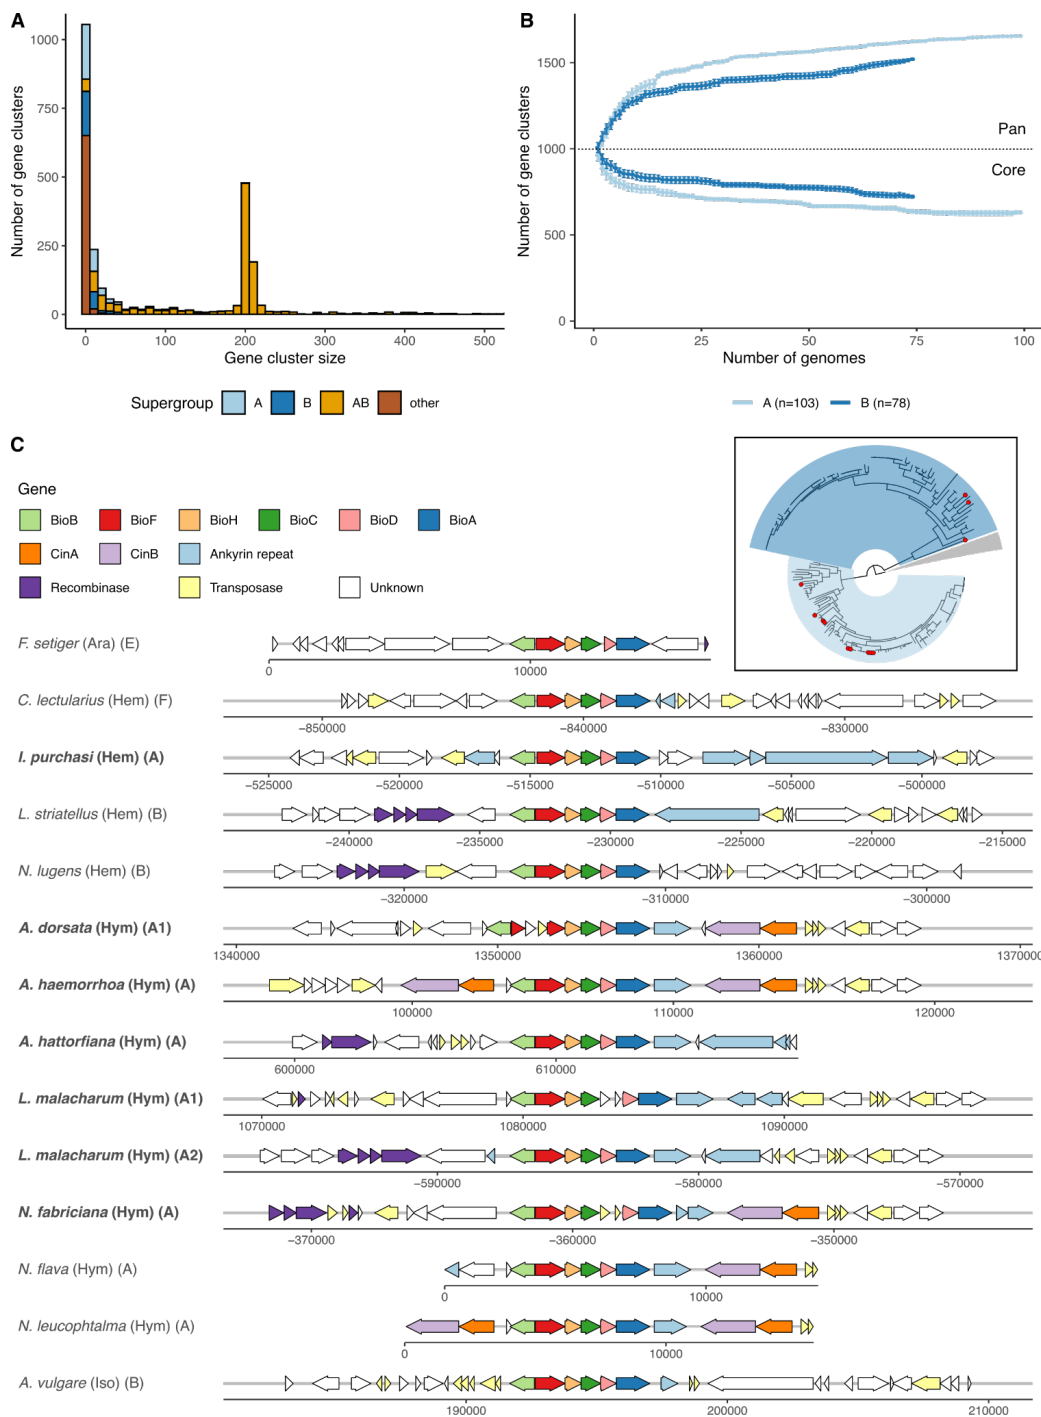

301

## 302 WO prophage insertions expand genome size

303 *Wolbachia* can itself be infected by double-stranded DNA temperate bacteriophages, WO  
304 phage, which can integrate in the genome of its host as a prophage. Four modules are  
305 necessary for construction and function of phage particles during the lytic stage: head,  
306 baseplate, tail and fibre, and inserted and pseudogenised WO phage can be identified and  
307 discriminated based on the presence and completeness of these components. Regions of a  
308 *Wolbachia* genome flanked by WO phage modules are likely to form components that are  
309 transduced by the phage during infection of new cells, “cargo” loci that form the Eukaryotic  
310 Association Module (EAM)<sup>36,37</sup>. All the *Wolbachia* genomes were screened for prophage  
311 regions using essential module genes from previously annotated WO insertions ([Table S4](#)).  
312 Prophage regions were deemed complete when all four modules were observed with at least  
313 80% of genes of each module present. An abundance of putative intact and pseudogenised  
314 WO phage were identified. For example the supergroup B *Wolbachia* from *Ischneura elegans*  
315 (the bluetail damselfly; the largest *Wolbachia* genome assembled) contained three putative  
316 intact prophage and nine WO phage fragments (Figure 5A) summing to 0.8 Mb of the genome.

317 The fraction of total prophage region in each genome ranged from 0-38%. Nematode-  
318 associated *Wolbachia* typically are not infected by WO phage<sup>38</sup> and no prophage regions were  
319 detected in genomes of supergroup C, D, J and nematode-infecting F (Figure 5B). A significant  
320 correlation was found between genome size and WO prophage span in supergroups A and B  
321 (Figure 5B). This association was robust to correction for phylogenetic relatedness of the  
322 genomes (model fit increased to 0.84 and 0.87 respectively with p-values <10<sup>-16</sup>).



323 **Figure 5: WO prophage in *Wolbachia***

324 **A** Annotation of the WO prophage integrated in the genome of the *Wolbachia* strain infecting *Ischnura elegans*.

326 **B** *Wolbachia* genome size is strongly correlated with integrated prophage span in supergroups with WO  
 327 phage association. Phylogenetic Generalised Least Squares (PGLS) analyses were performed to  
 328 assess the correlation between prophage length and genome size in a phylogenetically-aware manner.

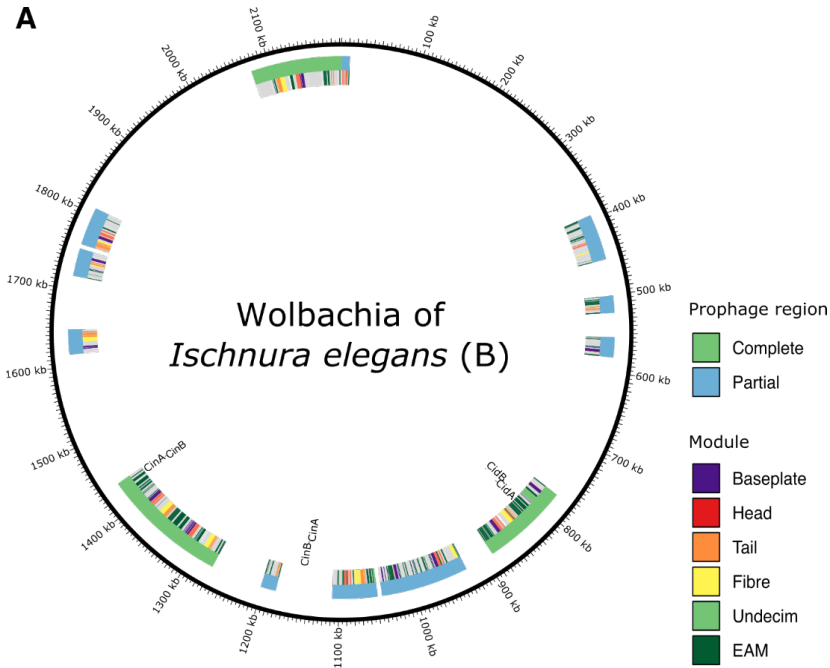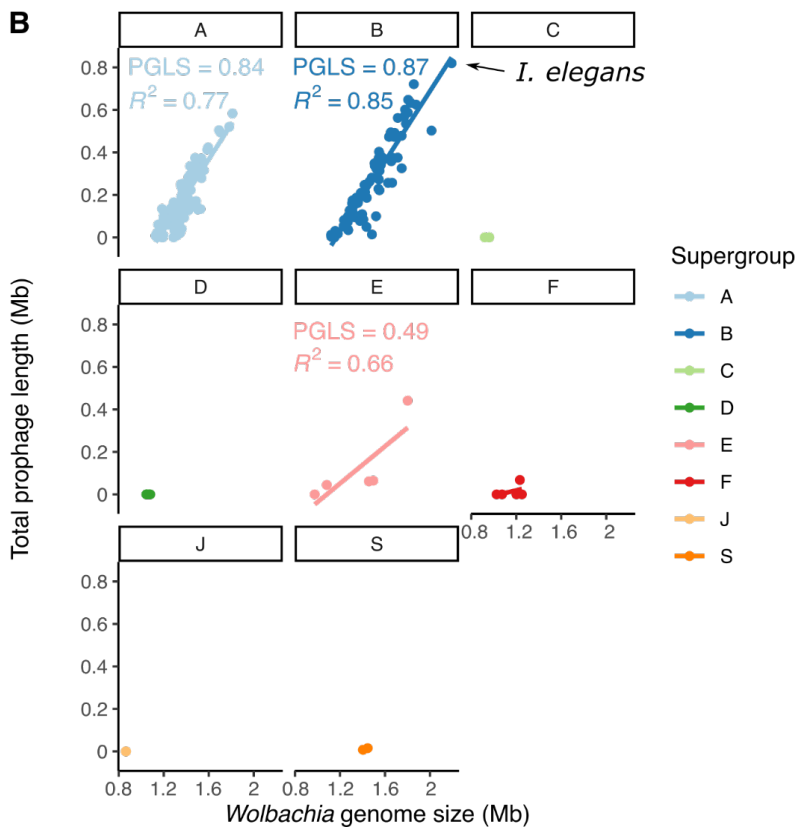

329

## 330 Toxins are often associated with mobile elements

331 We identified several potential cargo genes within intact and fragmented prophage. These  
332 included transposases and integrases associated with mobile elements, and other loci  
333 previously associated with eukaryotic manipulation, such as cytoplasmic incompatibility loci  
334 and ankyrin repeat containing genes, as expected from the EAM model<sup>36,37</sup>.

335 *Wolbachia* produces a suite of toxins<sup>39</sup> which can have dramatic effects on their hosts, such  
336 as cytoplasmic incompatibility (CI). The CI phenotype is caused by two adjacent genes, CifA  
337 and CifB, which function as a toxin-antitoxin pair<sup>40,41</sup>. Phylogenetic analysis classified most  
338 *Wolbachia* Cif gene pairs into four types (I-IV)<sup>42</sup>. A fifth type (V) is much more variable in  
339 structure. The toxin component can have nuclease activity (in which case the gene pair is  
340 frequently referred to as CinA-CinB), deubiquitinase (CidA-CidB) or both (CndA,CndB)<sup>43</sup>. All  
341 type II, III and IV pairs have nuclease domains, while all type I have deubiquitinase and most  
342 have nuclease<sup>42</sup>. Two hundred and sixty one full-length and likely functional Cif pairs were  
343 detected in 133 of the 181 (73%) supergroup A and B genomes. One Cif pair was detected in  
344 most genomes, but many had several, with seven copies in the *Wolbachia* strain infecting the  
345 holly tortrix moth (*Rhopobota naevana*). Most of the gene pairs (93) contained a  
346 deubiquitinase domain (type I, Cid), while the other four types occurred in roughly equal  
347 proportions (II: 40, III: 43, IV:35 and V:50). Many pairs (177/261; 69%) were located in the  
348 predicted EAM of the prophage.

349 Loci encoding additional toxins such as RelE/RelB, Spaid-like and latrotoxin were identified in  
350 multiple *Wolbachia* genomes, frequently in prophage regions (71/586 [12%], 136/597 [23%]  
351 and 227/382 [59%] genes, respectively). The Tc pore-forming toxin complex, which consists  
352 of two genes TcA and TcB-C, was detected in a limited number of A and B supergroup  
353 genomes and also showed a predisposition to occur within prophage (13/69 [19%] and 9/35  
354 [26%], respectively). Additional toxin-encoding loci had limited presence in different subgroups  
355 and were not associated with prophage regions. ParD/ParE only occurred in supergroups A,  
356 B and E, and FIC only occurred in supergroups A, E, F and S. The type IV toxin-antitoxin gene  
357 pair AbiEii/AbiGii-AbiEi, which protects against the spread of phage infection<sup>44</sup>, was only  
358 detected in two genomes in supergroup E. It is noteworthy that these two genomes had very  
359 low levels of prophage-derived DNA (4.3% of their genome span).

## 360 Discussion

361 Isolation of cobiont genomes, and specifically *Wolbachia* genomes, from shotgun high-  
362 throughput sequencing data has been established for many years<sup>45</sup>. In the field of prokaryotic  
363 and eukaryotic microbial metagenomics, metagenome-assembled genomes (MAGs) are likely  
364 to be the only way to access many unculturable microbial genomes, even if the species they  
365 derive from are hyperabundant<sup>46,47</sup>. The abundance of raw sequencing data in the  
366 International Nucleotide Sequence Database Collaboration (INSDC) databases has been an  
367 attractive prospecting ground for microbial associates of eukaryotic target species. To date,  
368 most raw data available for such searches have been short reads from Illumina and other  
369 platforms. These reads are too short to partition efficiently into bins corresponding to putative  
370 distinct genomes. Preliminary assembly of such datasets is more likely to be able to separate  
371 cobionts from target genomes. These approaches have been applied to hunt for *Wolbachia*  
372 with a recent *tour de force* generating nearly 1,200 *Wolbachia* MAGs from publicly available  
373 data<sup>14</sup>. However, these MAGs suffer from the expected issues of low completeness (due to  
374 low effective coverage), fragmentation (due to coverage and sequence repeat issues),  
375 undetected contamination and inability to distinguish co-infecting strains. Moreover, the biased  
376 nature of public data meant that these derived from only 37 different host species.

377 We generated 110 *Wolbachia* assemblies from 368 terrestrial arthropod HiFi datasets, and 77  
378 of these were fully circular genome assemblies. The genomes were uniformly of high  
379 completeness (Figure S2). Due to the high intrinsic base quality of HiFi reads (Q30 to Q40;  
380 from one error in 1000 to one error in 10,000) we were able to distinguish insertions of  
381 *Wolbachia* DNA into the host genome from true components of the *Wolbachia* genome, and  
382 to independently assemble even closely related strains with confidence. As we were screening  
383 raw data from a biodiversity genomics programme that aims to sample a wide phylogenetic  
384 diversity of hosts, the new *Wolbachia* genomes presented here more than double the number  
385 of different host species from which *Wolbachia* genomes have been assembled. The  
386 assembled genomes include the first representatives isolated from Odonata (damselflies) and  
387 Orthoptera (crickets). In 16 additional datasets we identified likely *Wolbachia* content but were  
388 not able to produce credible genome assemblies (see Supplemental Data, Table S2). This  
389 was usually because the *Wolbachia* sequence was present in very low effective coverage (~  
390 threefold) but in some samples no credible assembly was generated despite high coverage.  
391 These datasets may contain multiple recombining strains, or contain large insertions in the  
392 host genome and deserve further exploration.

393 The distribution of *Wolbachia* in insect hosts is a function of the balance between co-speciation  
394 (vertical transmission of *Wolbachia* among daughters of the host species) and horizontal  
395 transmission where strains move between species. Transmission among insect hosts was the  
396 dominant pattern underpinning *Wolbachia* distribution, but we identified two features of the  
397 distribution, one local and one general, that are of note. Lepidoptera were more likely to be  
398 infected with supergroup B *Wolbachia* than A, and Hymenoptera, Diptera and Coleoptera were  
399 more likely to be infected with supergroup A strains. Multi locus sequence typing (MLST) has  
400 previously shown that supergroup B is the most common *Wolbachia* type in Lepidoptera<sup>19,27-</sup>  
401 <sup>29</sup>. This suggests some non-exclusive specialisation of *Wolbachia* on their hosts, which may  
402 be driven by *Wolbachia* genetics, host genetics or (less likely) a distinct set of ecological  
403 transmission routes in each insect group. Many of our genomes derived from insects were  
404 collected at one site, the Wytham Woods Genomic Observatory (Figure S1) but this subset

405 was no more closely related than other genomes from widely separated sites (Figure S5). It is  
406 likely that the mobility of hosts, including through seasonal migration, means that sampling  
407 from one geographical site is a valid approximation of more global sampling.

408 Close ecological association between host species may promote sharing of *Wolbachia*  
409 isolates and localised genetic exchange, for example within predator-prey systems. The close  
410 similarity of *Wolbachia* genomes from *Andrena* solitary bees and their *Nomada* cuckoo bee  
411 kleptoparasites, and the shared occurrence of the biotin synthesis operon (Figure 4C) may be  
412 a case of transmission within an ecological network. The presence of the biotin operon in  
413 *Wolbachia* of insects that largely or solely feed on low-protein plant fluids (nectar or phloem)  
414 suggests that the *Wolbachia* may be offering nutritional support to their hosts<sup>48</sup>, and thus that  
415 this cluster of genomes may have been positively selected for their mutualist tendencies. Other  
416 genes whose distribution among isolates is driven by horizontal gene transfer, including by  
417 mobile elements such as phage, might be expected to have a distribution that is not explained  
418 by overall genome relatedness, and might reflect ecological association. We note that previous  
419 work has suggested that horizontal transmission rather than cospeciation may also explain  
420 closely related *Wolbachia* in closely related taxa. For example, genomic divergence between  
421 closely related *Wolbachia* in sister *Drosophila* species was too low to be the product of  
422 independent evolution since the last common ancestor of the flies<sup>49,50</sup>.

423 *Wolbachia* can promote reproductive success of their hosts<sup>1,2</sup>, and thus their own Darwinian  
424 fitness, through reproductive manipulations such as CI. The loci underpinning CI are a diverse  
425 set of toxin-antitoxin gene pairs. Our survey of *Wolbachia* identified many additional CI gene  
426 pairs, mainly of the I Cid type and mostly associated with WO phage. Many genomes had  
427 more than one toxin-antitoxin pair, and some individual hosts were infected with multiple  
428 *Wolbachia* strains carrying different CI gene pairs. These CI genes likely mediate conflict  
429 between *Wolbachia* strains and the ecosystem of toxin deposition and rescue in individual  
430 zygotes must be complex. Interestingly we identified CI gene pairs next to 5 of the 14 biotin  
431 synthesis operons, suggesting that the mobile elements that transduce this presumably  
432 mutualist physiology are also engaged in CI conflict.

433 One striking feature of the genomes assembled from the HiFi reads was that their average  
434 span was ~10% greater than the average size of previously-assembled *Wolbachia* genomes.  
435 As we also observed a correlation between content of WO phage in the genome and genome  
436 size (Figure 5B), we speculate that the lower average size of previous assemblies may be  
437 because the presence of near-identical segments of phage and other mobile elements led to  
438 collapse of repeats and artificial underestimation of true genome size. This underestimation of  
439 genome size may also have biased understanding of WO phage diversity and of the diversity  
440 of genes that can be transduced by the phage. WO phage carry genes necessary for  
441 production of phage particles and cargo genes that have been hypothesised to form an  
442 Eukaryotic Association Module (EAM)<sup>36,37</sup>. The increased genome size and increased  
443 resolution of WO phage copies might also mean increased gene content and diversity, and an  
444 increased set of common EAM loci. We estimated the pan-proteome of A and B supergroup  
445 strains, and found that the A supergroup had a higher pan-proteome but a smaller core  
446 proteome than supergroup B. Coupled with the observation of host-association bias between  
447 these supergroups, and other major genomic features such as GC proportion, this suggests  
448 that these divergent groups have followed very distinct evolutionary trajectories, despite  
449 evidence for transduction of loci between supergroups, and perhaps have evolved distinct  
450 physiologies and host-manipulation or -cooperation strategies. We note that the average

451 nucleotide identity (ANI) between A and B supergroup strains, and between strains from all  
452 supergroups, is relatively low (within-supergroup identity >93%, between supergroup identity  
453 <88%). This pattern of significant phylogenetic separation between supergroups suggests, as  
454 others have noted, that these supergroups have the features expected of bacterial species<sup>33</sup>.

455 The Darwin Tree of Life project<sup>15</sup> is one of a growing constellation of biodiversity genomics  
456 initiatives worldwide that, under the banner of the Earth BioGenome Project<sup>51</sup>, intend to  
457 “sequence life for the future of life” (<https://www.earthbiogenome.org>). These projects, based  
458 around ecological, regional or taxonomic lists of target species, will lay the foundations for  
459 biological research, bioindustry and conservation for the next decades. While their focus is to  
460 generate reference genomes for eukaryotic species, these projects will also yield critical  
461 resources for the study of the microbial cobionts – mutualists, pathogens, parasites and  
462 commensals – that live on and in eukaryotic organisms. Our understanding of *Wolbachia* and  
463 other common endosymbionts will thrive on a rich harvest of cobiont genomes from the tens  
464 to hundreds of thousands of host genomes that will be generated in the next decade. The  
465 assembly of 110 high-quality *Wolbachia* genomes shows the power of the long read data now  
466 being generated and the analytic approach that allowed these low complexity metagenomes  
467 to be effectively separated into their constituent parts. Analysis of these genomes revealed a  
468 propensity to infect different insect orders among supergroups, while simultaneously  
469 pinpointing to several host switching events during the course of the *Wolbachia* pandemic.  
470 Moreover, we observed that genome size in *Wolbachia* is correlated with the abundance of  
471 active and pseudogenised copies of bacteriophage WO.



## 472 Methods

### 473 Detection and assembly of *Wolbachia* genomes from DToL 474 species data

475 DToL raw data are generated from whole or partial single specimens, and thus contain  
476 sequence from any cobionts in or on the specimen at the time of sampling. We screened data  
477 for 368 insect genomes generated by the Darwin Tree of Life project<sup>15</sup> for the presence of the  
478 intracellular endosymbiont *Wolbachia* ([Table S1](#)) using a marker gene scan approach by  
479 searching for the small subunit rRNA locus. The prokaryotic 16S rRNA alignment from RFAM  
480 (RF00177)<sup>52</sup> was transformed into a HMMER profile and the profile was used to screen contigs  
481 with nhmmscan<sup>53</sup>. We defined a positive match as having an e-value  $<10^{-150}$  or an aligned  
482 length of  $>1000$  nucleotides. Putative positive regions were extracted from the sequences,  
483 and compared to the SILVA SSU database (version 138.1)<sup>54</sup> using sina<sup>55</sup>. Matches were  
484 filtered to retain only those with  $>90\%$  identity. Taxonomic classification of each positive was  
485 determined via a consensus rule of 80 percent of the top 20 best hits, using both the NCBI<sup>56</sup>  
486 and SILVA<sup>57</sup> taxonomies.

487 For *Wolbachia*-positive samples, all PacBio HiFi reads were analysed using kraken2<sup>58</sup> with a  
488 custom database consisting of a genome from a species closely related to the host, all RefSeq  
489 genomes of Anaplasmataceae and reference genomes of additionally detected cobionts  
490 downloaded using NCBI datasets and masked using dustmasker<sup>59</sup>. Horizontal transfer of  
491 fragments of endosymbiont and organellar DNA to the nuclear genome is a common  
492 phenomenon. To avoid inadvertently classifying nuclear *Wolbachia* insertions (NUWTs) as  
493 deriving from an independent bacterial replicon, *Wolbachia* reads identified by kraken2 were  
494 mapped to the insect genome assembly and only contigs fully covered by these reads were  
495 retained. The *Wolbachia* reads were also independently re-assembled using several assembly  
496 tools: flye (version 2.9) (flye --pacbio-hifi {reads} -o {dir} -t {threads} --asm-coverage 50 --  
497 genome-size 1.6m --scaffold)<sup>60</sup>, hifiasm (version 0.14) (hifiasm -o {prefix} -t {threads} {reads}  
498 -D 10 -l 1 -s 0.999)<sup>61</sup> and hifiasm-meta (version 0.1-r022) (hifiasm\_meta -o {prefix} -t {threads}  
499 {reads} -l 1)<sup>62</sup>. The several assemblies generated for each sample were ranked based on their  
500 completeness using BUSCO version 5.2.2<sup>63</sup> and the Rickettsiales\_odb10 dataset, alignment  
501 to reference genomes using nucmer (version 4.0.0)<sup>64</sup>, evenness of coverage and circularity.  
502 The best (most complete, single-contig circular preferred) assembly per sample was chosen.  
503 For samples where 10X Genomics Chromium data were available, polishing was performed  
504 using FreeBayes-called variants<sup>65</sup> from 10X short reads aligned with LongRanger. The host  
505 origin, span and completeness of all *Wolbachia* detected is presented in [Table S2](#).

### 506 Collation of *Wolbachia* genome dataset, gene prediction and 507 orthology inference

508 All available *Wolbachia* genomes were downloaded from NCBI GenBank on 01/02/2022, and  
509 supplemented with assemblies generated from short-read insect datasets by Scholz et al.<sup>14</sup>.  
510 This dataset contained replicate genomes for very closely related *Wolbachia* from the same  
511 host, and many fragmented and partial assemblies. Only the most contiguous assembly per  
512 host species was retained. These genomes were renamed using the schema

513 “R\_Xyz\_GenSpec\_§”, where Xyz is the first three letters of the insect order of the host,  
514 GenSpec is an abbreviation derived from the generic and specific epithets of the host, and §  
515 indicates the supergroup. Retained assemblies were assessed for the presence of  
516 contamination by performing a contig analysis by kraken2 using a database of only circular  
517 *Wolbachia* genomes. A list of all removed contigs can be found in [Table S3](#). Furthermore, we  
518 only included database-sourced *Wolbachia* genomes with at least 90% BUSCO  
519 completeness<sup>63</sup> and at most 3% duplication with the Rickettsiales\_odb10 dataset ([Table S3](#)).  
520 The exception to this filtering was the inclusion of genomes belonging to the most divergent  
521 supergroup S.

522 All of the publicly available and newly assembled genomes were annotated using Prodigal  
523 (version 2.6.3)<sup>25</sup>. Protein families were inferred using OrthoFinder (version 2.4.0)<sup>26</sup>. We  
524 identified 624 protein families which were single-copy in more than 95% of all *Wolbachia*  
525 genomes. These were individually aligned using mafft in automatic mode (version 7.490)<sup>66</sup>.  
526 Individual maximum likelihood gene trees were calculated using iqtree (version 2.1.4) (iqtree  
527 -s {alignment} -nt {threads})<sup>67</sup>, and coalescence of these gene trees was determined using  
528 ASTRAL (version 5.7.4)<sup>68</sup>. The individual alignments were trimmed using trimAl (version 1.4)<sup>69</sup>,  
529 and concatenated to form a supermatrix. This was used to infer a maximum likelihood  
530 phylogeny with iqtree using 1000 ultrafast bootstrap approximation iterations (version 2.1.4)  
531 (iqtree -s {supermatrix} -m LG+G4 -bb 1000 -nt {threads})<sup>67</sup>. The insect topology was  
532 subsampled from Chesters and al<sup>70</sup>. Incongruence in topology between the insect host and  
533 *Wolbachia*, host phylogeny was determined with ggtree in R<sup>71</sup>.

## 534 Intrinsic genomic properties

535 All circular genomes were rotated to start with HemE (OG0000716) on the positive strand, as  
536 this gene is located next to the origin of replication<sup>72</sup>. All pairwise alignments were calculated  
537 using nucmer (version 4.0.0)<sup>64</sup>, and breakpoints were inferred and adjusted for the aligned  
538 coverage. Average nucleotide diversity was calculated using FastANI (version 1.33)<sup>73</sup>. GC and  
539 GC skew index values were calculated for all genomes using SkewIT<sup>30</sup>.

## 540 Gene content analysis

541 To functionally annotate predicted genes, both Prokka (version 1.14.6)<sup>74</sup> and InterProScan  
542 (version 5.54-87.0)<sup>75</sup> were run. The synteny plot of the biotin locus was created using  
543 gggenes<sup>76</sup>. All six genes that make up the biotin locus (BioA-D, BioF, BioH) were individually  
544 aligned with mafft in automatic mode (version 7.490)<sup>66</sup> and transformed into a concatenated  
545 nucleotide alignment. A phylogenetic tree was built using the model GTR+F+G4 in iqtree  
546 (version 2.1.4)<sup>67</sup>. Genes responsible for cytoplasmic incompatibility (CI) were identified by a  
547 BLAST search<sup>77</sup> using the following genes as queries: CidA: WP\_010962721.1,  
548 WP\_182158704.1; CidB: WP\_010962722.1, WP\_182158703.1 and CinA: CAQ54402.1;  
549 CinB: CAQ54403.1. Only pairs of identified neighbouring genes (e-value  $1e^{-30}$ , coverage 80-  
550 120%) were retained.

## 551 WO prophage analysis

552 A list of known prophage sequences was generated based on annotated regions described in  
553 the literature<sup>37,40,78</sup> ([Table S4](#)) for a set of genomes (R\_Dip\_DroSim\_A, R\_Hym\_NasVit\_A,



554 R\_Dip\_DroAna\_A, R\_Dip\_Haelrr\_A, R\_Hym\_CerSol\_A and R\_Hym\_WiePum\_A) and linked  
555 to their respective gene families. Each *Wolbachia* genome was screened for continuous  
556 stretches of linked prophage genes with at most five other genes in-between and these were  
557 annotated as prophage regions if they contained at least one gene from one of the four core  
558 phage modules (head, baseplate, tail, fibre). This permitted detection of novel prophage-  
559 associated genes. Regions which contained at least 5 of 6 head, 7 of 8 baseplate, 5 of 6 fibre  
560 and 5 of 6 tail module genes were deemed complete. Genomic maps of prophage integration  
561 were created with circos<sup>79</sup>. Phylogenetic Generalised Least Squares analyses were performed  
562 to assess the correlation between prophage length and genome size using the ape R  
563 package<sup>80</sup>, using a Brownian model of evolution and the phylogenetic tree in Figure 2A. R  
564 squared values were calculated using the package rr2<sup>81</sup>.

## 565 Acknowledgements

566 We thank our many colleagues in the Darwin Tree of Life project – from field collectors to data  
567 curators – for the production of the raw data we analysed. We also thank Tree of Life  
568 colleagues, especially Claudia Weber, Charlotte Wright and Ellen Cameron for fruitful  
569 discussions and Andrew Varley, James Torrance and Shane McCarthy for help with sequence  
570 deposition. This research was funded by the Wellcome Trust Grants 206194 and 218328. For  
571 the purpose of Open Access, the author has applied a CC BY public copyright licence to any  
572 Author Accepted Manuscript version arising from this submission.

## 573 Data availability

574 The raw data for each species analysed is available under BioProject PRJEB40665  
575 (<https://www.ebi.ac.uk/ena/browser/view/PRJEB40665>). Darwin Tree of Life species and data  
576 are collated in the project portal at <https://portal.darwintreeoflife.org>. The *Wolbachia* genome  
577 assemblies are currently in progress for sequence deposition in INSDC, but can already be  
578 accessed on Zenodo (<https://doi.org/10.5281/zenodo.7092419>).

## 579 References

- 580 1. Yen, J. H. & Barr, A. R. New Hypothesis of the Cause of Cytoplasmic Incompatibility in *Culex*  
581 *pipiens* L. *Nature* **232**, 657–658 (1971).
- 582 2. Yen, J. H. & Barr, A. R. The etiological agent of cytoplasmic incompatibility in *Culex pipiens*.  
583 *Journal of Invertebrate Pathology* **22**, 242–250 (1973).
- 584 3. Bordenstein, S. R., O'Hara, F. P. & Werren, J. H. Wolbachia-induced incompatibility precedes  
585 other hybrid incompatibilities in *Nasonia*. *Nature* **409**, 707–710 (2001).
- 586 4. Hurst, G. D. D. *et al.* Male-killing Wolbachia in two species of insect. *Proc. R. Soc. Lond. B* **266**,  
587 735–740 (1999).
- 588 5. Stouthamer, R., Breeuwer, J. A. J., Luck, R. F. & Werren, J. H. Molecular identification of  
589 microorganisms associated with parthenogenesis. *Nature* **361**, 66–68 (1993).
- 590 6. Hornett, E. A. *et al.* Evolution of Male-Killer Suppression in a Natural Population. *PLoS Biol* **4**, e283  
591 (2006).
- 592 7. Werren, J. H., Baldo, L. & Clark, M. E. Wolbachia: master manipulators of invertebrate biology. *Nat*  
593 *Rev Microbiol* **6**, 741–751 (2008).
- 594 8. Nikoh, N. *et al.* Evolutionary origin of insect–*Wolbachia* nutritional mutualism. *Proc. Natl. Acad.*  
595 *Sci. U.S.A.* **111**, 10257–10262 (2014).
- 596 9. Pan, X. *et al.* The bacterium Wolbachia exploits host innate immunity to establish a symbiotic  
597 relationship with the dengue vector mosquito *Aedes aegypti*. *ISME J* **12**, 277–288 (2018).
- 598 10. Hoerauf, A., Mand, S., Adjei, O., Fleischer, B. & Büttner, D. W. Depletion of wolbachia  
599 endobacteria in *Onchocerca volvulus* by doxycycline and microfilaridermia after ivermectin  
600 treatment. *The Lancet* **357**, 1415–1416 (2001).
- 601 11. Zug, R. & Hammerstein, P. Still a Host of Hosts for Wolbachia: Analysis of Recent Data  
602 Suggests That 40% of Terrestrial Arthropod Species Are Infected. *PLoS ONE* **7**, e38544 (2012).
- 603 12. Zhou, W., Rousset, F. & O'Neill, S. Phylogeny and PCR-based classification of Wolbachia  
604 strains using *wsp* gene sequences. *Proc. R. Soc. Lond. B* **265**, 509–515 (1998).
- 605 13. Glowska, E., Dragun-Damian, A., Dabert, M. & Gerth, M. New Wolbachia supergroups  
606 detected in quill mites (Acari: Syringophilidae). *Infection, Genetics and Evolution* **30**, 140–146  
607 (2015).
- 608 14. Scholz, M. *et al.* Large scale genome reconstructions illuminate Wolbachia evolution. *Nat*  
609 *Commun* **11**, 5235 (2020).
- 610 15. The Darwin Tree of Life Project Consortium. Sequence locally, think globally: The Darwin  
611 Tree of Life Project. *Proceedings of the National Academy of Sciences* **119**, e2115642118 (2022).
- 612 16. Challis, R., Richards, E., Rajan, J., Cochrane, G. & Blaxter, M. BlobToolKit – Interactive  
613 Quality Assessment of Genome Assemblies. *G3 Genes|Genomes|Genetics* **10**, 1361–1374 (2020).
- 614 17. Eren, A. M. *et al.* Anvi'o: an advanced analysis and visualization platform for 'omics data.  
615 *PeerJ* **3**, e1319 (2015).
- 616 18. Regan, T. *et al.* Characterisation of the British honey bee metagenome. *Nat Commun* **9**, 4995  
617 (2018).

- 618 19. West, S. A., Cook, J. M., Werren, J. H. & Godfray, H. C. J. *Wolbachia* in two insect host–  
619 parasitoid communities. *Molecular Ecology* **7**, 1457–1465 (1998).
- 620 20. Duron, O. *et al.* The diversity of reproductive parasites among arthropods: *Wolbachia* do not  
621 walk alone. *BMC Biol* **6**, 27 (2008).
- 622 21. Savill, P., Perrins, C., Kirby, K. & Fisher, N. *Wytham woods: Oxford's ecological laboratory*.  
623 (Oxford Univ. Press, 2011).
- 624 22. Hilgenboecker, K., Hammerstein, P., Schlattmann, P., Telschow, A. & Werren, J. H. How  
625 many species are infected with *Wolbachia*? – a statistical analysis of current data: *Wolbachia*  
626 infection rates. *FEMS Microbiology Letters* **281**, 215–220 (2008).
- 627 23. Ahmed, M. Z., Breinholt, J. W. & Kawahara, A. Y. Evidence for common horizontal  
628 transmission of *Wolbachia* among butterflies and moths. *BMC Evol Biol* **16**, 118 (2016).
- 629 24. Misof, B. *et al.* Phylogenomics resolves the timing and pattern of insect evolution. *Science*  
630 **346**, 763–767 (2014).
- 631 25. Hyatt, D. *et al.* Prodigal: prokaryotic gene recognition and translation initiation site  
632 identification. *BMC Bioinformatics* **11**, 119 (2010).
- 633 26. Emms, D. M. & Kelly, S. OrthoFinder: phylogenetic orthology inference for comparative  
634 genomics. *Genome Biol* **20**, 238 (2019).
- 635 27. Russell, J. A. *et al.* Specialization and geographic isolation among *Wolbachia* symbionts from  
636 ants and lycaenid butterflies. *Evolution* **63**, 624–640 (2009).
- 637 28. Werren, J. H. & Windsor, D. M. *Wolbachia* infection frequencies in insects: evidence of a  
638 global equilibrium? *Proc. R. Soc. Lond. B* **267**, 1277–1285 (2000).
- 639 29. Tagami, Y. & Miura, K. Distribution and prevalence of *Wolbachia* in Japanese populations of  
640 Lepidoptera: *Wolbachia* in Japanese Lepidoptera. *Insect Molecular Biology* **13**, 359–364 (2004).
- 641 30. Lu, J. & Salzberg, S. L. SkewIT: The Skew Index Test for large-scale GC Skew analysis of  
642 bacterial genomes. *PLoS Comput Biol* **16**, e1008439 (2020).
- 643 31. Comandatore, F. *et al.* Supergroup C *Wolbachia*, mutualist symbionts of filarial nematodes,  
644 have a distinct genome structure. *Open Biol.* **5**, 150099 (2015).
- 645 32. Mahmood, S., Nováková, E., Martinů, J., Sychra, O. & Hypša, V. *Extremely reduced*  
646 *supergroup F Wolbachia : transition to obligate insect symbionts*.  
647 <http://biorxiv.org/lookup/doi/10.1101/2021.10.15.464041> (2021) doi:10.1101/2021.10.15.464041.
- 648 33. Ellegaard, K. M., Klasson, L., Näslund, K., Bourtzis, K. & Andersson, S. G. E. Comparative  
649 Genomics of *Wolbachia* and the Bacterial Species Concept. *PLoS Genet* **9**, e1003381 (2013).
- 650 34. Gerth, M. & Bleidorn, C. Comparative genomics provides a timeframe for *Wolbachia* evolution  
651 and exposes a recent biotin synthesis operon transfer. *Nat Microbiol* **2**, 16241 (2017).
- 652 35. Gerth, M., Röthe, J. & Bleidorn, C. Tracing horizontal *Wolbachia* movements among bees  
653 (*Anthophila*): a combined approach using multilocus sequence typing data and host phylogeny.  
654 *Mol Ecol* **22**, 6149–6162 (2013).
- 655 36. Bordenstein, S. R. & Bordenstein, S. R. Eukaryotic association module in phage WO  
656 genomes from *Wolbachia*. *Nat Commun* **7**, 13155 (2016).
- 657 37. Bordenstein, S. R. & Bordenstein, S. R. Widespread phages of endosymbionts: Phage WO

- 658 genomics and the proposed taxonomic classification of Symbioviridae. *PLoS Genet* **18**, e1010227  
659 (2022).
- 660 38. Gavotte, L. *et al.* A Survey of the Bacteriophage WO in the Endosymbiotic Bacteria  
661 *Wolbachia*. *Molecular Biology and Evolution* **24**, 427–435 (2006).
- 662 39. Massey, J. H. & Newton, I. L. G. Diversity and function of arthropod endosymbiont toxins.  
663 *Trends in Microbiology* **30**, 185–198 (2022).
- 664 40. LePage, D. P. *et al.* Prophage WO genes recapitulate and enhance *Wolbachia*-induced  
665 cytoplasmic incompatibility. *Nature* **543**, 243–247 (2017).
- 666 41. Beckmann, J. F., Ronau, J. A. & Hochstrasser, M. A *Wolbachia* deubiquitylating enzyme  
667 induces cytoplasmic incompatibility. *Nat Microbiol* **2**, 17007 (2017).
- 668 42. Martinez, J., Klasson, L., Welch, J. J. & Jiggins, F. M. Life and Death of Selfish Genes:  
669 Comparative Genomics Reveals the Dynamic Evolution of Cytoplasmic Incompatibility. *Molecular*  
670 *Biology and Evolution* **38**, 2–15 (2021).
- 671 43. Beckmann, J. F. *et al.* The Toxin–Antidote Model of Cytoplasmic Incompatibility: Genetics and  
672 Evolutionary Implications. *Trends in Genetics* **35**, 175–185 (2019).
- 673 44. Dy, R. L., Przybilski, R., Semeijn, K., Salmond, G. P. C. & Fineran, P. C. A widespread  
674 bacteriophage abortive infection system functions through a Type IV toxin–antitoxin mechanism.  
675 *Nucleic Acids Research* **42**, 4590–4605 (2014).
- 676 45. Kumar, S. & Blaxter, M. L. Simultaneous genome sequencing of symbionts and their hosts.  
677 *Symbiosis* **55**, 119–126 (2011).
- 678 46. Almeida, A. *et al.* A unified catalog of 204,938 reference genomes from the human gut  
679 microbiome. *Nat Biotechnol* **39**, 105–114 (2021).
- 680 47. Parks, D. H. *et al.* Recovery of nearly 8,000 metagenome-assembled genomes substantially  
681 expands the tree of life. *Nat Microbiol* **2**, 1533–1542 (2017).
- 682 48. Ju, J.-F. *et al.* *Wolbachia* supplement biotin and riboflavin to enhance reproduction in  
683 planthoppers. *ISME J* **14**, 676–687 (2020).
- 684 49. Conner, W. R. *et al.* Genome comparisons indicate recent transfer of *w* Ri-like *Wolbachia*  
685 between sister species *Drosophila suzukii* and *D. subpulchrella*. *Ecol Evol* **7**, 9391–9404 (2017).
- 686 50. Turelli, M. *et al.* Rapid Global Spread of *w*Ri-like *Wolbachia* across Multiple *Drosophila*.  
687 *Current Biology* **28**, 963–971.e8 (2018).
- 688 51. Lewin, H. A. *et al.* The Earth BioGenome Project 2020: Starting the clock. *Proc. Natl. Acad.*  
689 *Sci. U.S.A.* **119**, e2115635118 (2022).
- 690 52. Kalvari, I. *et al.* Rfam 14: expanded coverage of metagenomic, viral and microRNA families.  
691 *Nucleic Acids Research* **49**, D192–D200 (2021).
- 692 53. Eddy, S. R. Accelerated Profile HMM Searches. *PLOS Computational Biology* **7**, e1002195  
693 (2011).
- 694 54. Quast, C. *et al.* The SILVA ribosomal RNA gene database project: improved data processing  
695 and web-based tools. *Nucleic Acids Research* **41**, D590–D596 (2013).
- 696 55. Pruesse, E., Peplies, J. & Glöckner, F. O. SINA: Accurate high-throughput multiple sequence  
697 alignment of ribosomal RNA genes. *Bioinformatics* **28**, 1823–1829 (2012).

- 698 56. Schoch, C. L. *et al.* NCBI Taxonomy: a comprehensive update on curation, resources and  
699 tools. *Database* **2020**, baaa062 (2020).
- 700 57. Yilmaz, P. *et al.* The SILVA and “All-species Living Tree Project (LTP)” taxonomic  
701 frameworks. *Nucl. Acids Res.* **42**, D643–D648 (2014).
- 702 58. Wood, D. E., Lu, J. & Langmead, B. Improved metagenomic analysis with Kraken 2. *Genome*  
703 *Biology* **20**, 257 (2019).
- 704 59. Morgulis, A., Gertz, E. M., Schäffer, A. A. & Agarwala, R. A fast and symmetric DUST  
705 implementation to mask low-complexity DNA sequences. *J Comput Biol* **13**, 1028–1040 (2006).
- 706 60. Kolmogorov, M., Yuan, J., Lin, Y. & Pevzner, P. A. Assembly of long, error-prone reads using  
707 repeat graphs. *Nat Biotechnol* **37**, 540–546 (2019).
- 708 61. Cheng, H., Concepcion, G. T., Feng, X., Zhang, H. & Li, H. Haplotype-resolved de novo  
709 assembly using phased assembly graphs with hifiasm. *Nat Methods* **18**, 170–175 (2021).
- 710 62. Feng, X., Cheng, H., Portik, D. & Li, H. Metagenome assembly of high-fidelity long reads with  
711 hifiasm-meta. *Nat Methods* **19**, 671–674 (2022).
- 712 63. Manni, M., Berkeley, M. R., Seppey, M., Simão, F. A. & Zdobnov, E. M. BUSCO Update:  
713 Novel and Streamlined Workflows along with Broader and Deeper Phylogenetic Coverage for  
714 Scoring of Eukaryotic, Prokaryotic, and Viral Genomes. *Molecular Biology and Evolution* **38**, 4647–  
715 4654 (2021).
- 716 64. Marçais, G. *et al.* MUMmer4: A fast and versatile genome alignment system. *PLOS*  
717 *Computational Biology* **14**, e1005944 (2018).
- 718 65. Garrison, E. & Marth, G. *Haplotype-based variant detection from short-read sequencing*.  
719 <http://arxiv.org/abs/1207.3907> (2012) doi:10.48550/arXiv.1207.3907.
- 720 66. Katoh, K. & Standley, D. M. MAFFT Multiple Sequence Alignment Software Version 7:  
721 Improvements in Performance and Usability. *Molecular Biology and Evolution* **30**, 772–780 (2013).
- 722 67. Minh, B. Q. *et al.* IQ-TREE 2: New Models and Efficient Methods for Phylogenetic Inference in  
723 the Genomic Era. *Molecular Biology and Evolution* **37**, 1530–1534 (2020).
- 724 68. Mirarab, S. *et al.* ASTRAL: genome-scale coalescent-based species tree estimation.  
725 *Bioinformatics* **30**, i541–i548 (2014).
- 726 69. Capella-Gutiérrez, S., Silla-Martínez, J. M. & Gabaldón, T. trimAl: a tool for automated  
727 alignment trimming in large-scale phylogenetic analyses. *Bioinformatics* **25**, 1972–1973 (2009).
- 728 70. Chesters, D. Construction of a Species-Level Tree of Life for the Insects and Utility in  
729 Taxonomic Profiling. *Syst Biol* syw099 (2016) doi:10.1093/sysbio/syw099.
- 730 71. Yu, G., Lam, T. T.-Y., Zhu, H. & Guan, Y. Two Methods for Mapping and Visualizing  
731 Associated Data on Phylogeny Using *Ggtree*. *Molecular Biology and Evolution* **35**, 3041–3043  
732 (2018).
- 733 72. Ioannidis, P. *et al.* New criteria for selecting the origin of DNA replication in Wolbachia and  
734 closely related bacteria. *BMC Genomics* **8**, 182 (2007).
- 735 73. Jain, C., Rodriguez-R, L. M., Phillippy, A. M., Konstantinidis, K. T. & Aluru, S. High throughput  
736 ANI analysis of 90K prokaryotic genomes reveals clear species boundaries. *Nat Commun* **9**, 5114  
737 (2018).

- 738 74. Seemann, T. Prokka: rapid prokaryotic genome annotation. *Bioinformatics* **30**, 2068–2069  
739 (2014).
- 740 75. Quevillon, E. *et al.* InterProScan: protein domains identifier. *Nucleic Acids Research* **33**,  
741 W116–W120 (2005).
- 742 76. Wilkins, D. gggenes. <https://github.com/wilkox/gggenes>.
- 743 77. Altschul, S. F., Gish, W., Miller, W., Myers, E. W. & Lipman, D. J. Basic local alignment  
744 search tool. *Journal of Molecular Biology* **215**, 403–410 (1990).
- 745 78. Miao, Y., Xiao, J. & Huang, D. Distribution and Evolution of the Bacteriophage WO and Its  
746 Antagonism With Wolbachia. *Front. Microbiol.* **11**, 595629 (2020).
- 747 79. Krzywinski, M. *et al.* Circos: an information aesthetic for comparative genomics. *Genome Res*  
748 **19**, 1639–1645 (2009).
- 749 80. Paradis, E. & Schliep, K. ape 5.0: an environment for modern phylogenetics and evolutionary  
750 analyses in R. *Bioinformatics* **35**, 526–528 (2019).
- 751 81. Ives, A. R. R2s for Correlated Data: Phylogenetic Models, LMMs, and GLMMs. *Systematic*  
752 *Biology* **68**, 234–251 (2019).
